# Supplementary material
Source: PubMed Central journal article supplement (PMC3146047)
Supplement: NIHMS34135-supplement-1.pdf [file NIHMS34135-supplement-1.pdf]

**Supplementary Table 1 | Ability of *Ilp6* expression in various cell types to reactivate quiescent neuroblasts during nutrient restriction**

| Cell type                                            | Driver                                  | Reactivation |
|------------------------------------------------------|-----------------------------------------|--------------|
| <b>Mushroom Body neuroblasts/neurons*</b>            | <i>OK107-GAL4</i>                       | +            |
| <b>Dopamine Receptor<sup>+</sup> neurons</b>         | <i>DopR-GAL4</i>                        | –            |
| <b>Eagle<sup>+</sup> neuroblasts/neurons</b>         | <i>eg-GAL4</i>                          | –            |
| <b>Ubx-expressing neurons &amp; glia</b>             | <i>Ubx-GAL4</i>                         | ++           |
| <b>Ilp6-expressing glia</b>                          | <i>Ilp6-GAL4</i>                        | +            |
| <b>Midline glia/neurons</b>                          | <i>Sim-GAL4</i>                         | –            |
| <b>Midline glia</b>                                  | <i>Slit-GAL4</i>                        | –            |
| <b>Subperineurial glia (BBB subset)</b>              | <i>Moody-GAL4</i>                       | –            |
| <b>Cortex glia</b>                                   | <i>NP577-GAL4</i>                       | ++           |
| <b>Ensheathing glia</b>                              | <i>NP6520-GAL4</i>                      | –            |
| <b>Glial clones (few &amp; small)</b>                | <i>Repo-FLP,tub&gt;&gt;GAL4,UAS-GFP</i> | –            |
| <b>Trachea &amp; glial subset</b>                    | <i>btl-GAL4</i>                         | –            |
| <b>Segmentally repeated neuroblasts/<br/>neurons</b> | <i>wg-GAL4</i>                          | –            |
| <b>Segmentally repeated neuroblasts/<br/>neurons</b> | <i>en-GAL4</i>                          | +            |
| <b>Fat body</b>                                      | <i>Cg-GAL4</i>                          | –            |

\* Used as MB driver but not restricted to MB neuroblasts

– No reactivation

+ Reactivation (central brain neuroblasts and few or no thoracic ones)

++ Strong reactivation (including many thoracic neuroblasts and few or no abdominal ones)

BBB Blood-brain barrier

**Supplementary Table 2 | Ability of *Ilp* expression in mNSCs, neurons or glia to reactivate quiescent neuroblasts during nutrient restriction**

| Cell type           | Driver            | <i>Ilp1</i> | <i>Ilp2</i> * | <i>Ilp3</i> | <i>Ilp4</i> | <i>Ilp5</i> | <i>Ilp6</i> | <i>Ilp7</i> |
|---------------------|-------------------|-------------|---------------|-------------|-------------|-------------|-------------|-------------|
| <b>mNSCs</b>        | <i>Ilp2-GAL4</i>  | –           | –             | –           | –           | –           | –           | –           |
| <b>Pan neuronal</b> | <i>n-syb-GAL4</i> | –           | +             | +           | ++          | ++          | ++          | –           |
| <b>Pan glial</b>    | <i>Repo-GAL4</i>  | –           | +             | –           | ++          | +           | ++          | –           |

\* At 25 °C due to lethality at higher temperatures; for glia, *repo-GAL4* was used with *tub-GAL80<sup>ts</sup>*

– No reactivation

+ Reactivation (central brain neuroblasts and few or none thoracic ones)

++ Strong reactivation (including many thoracic neuroblasts and few or none abdominal ones)

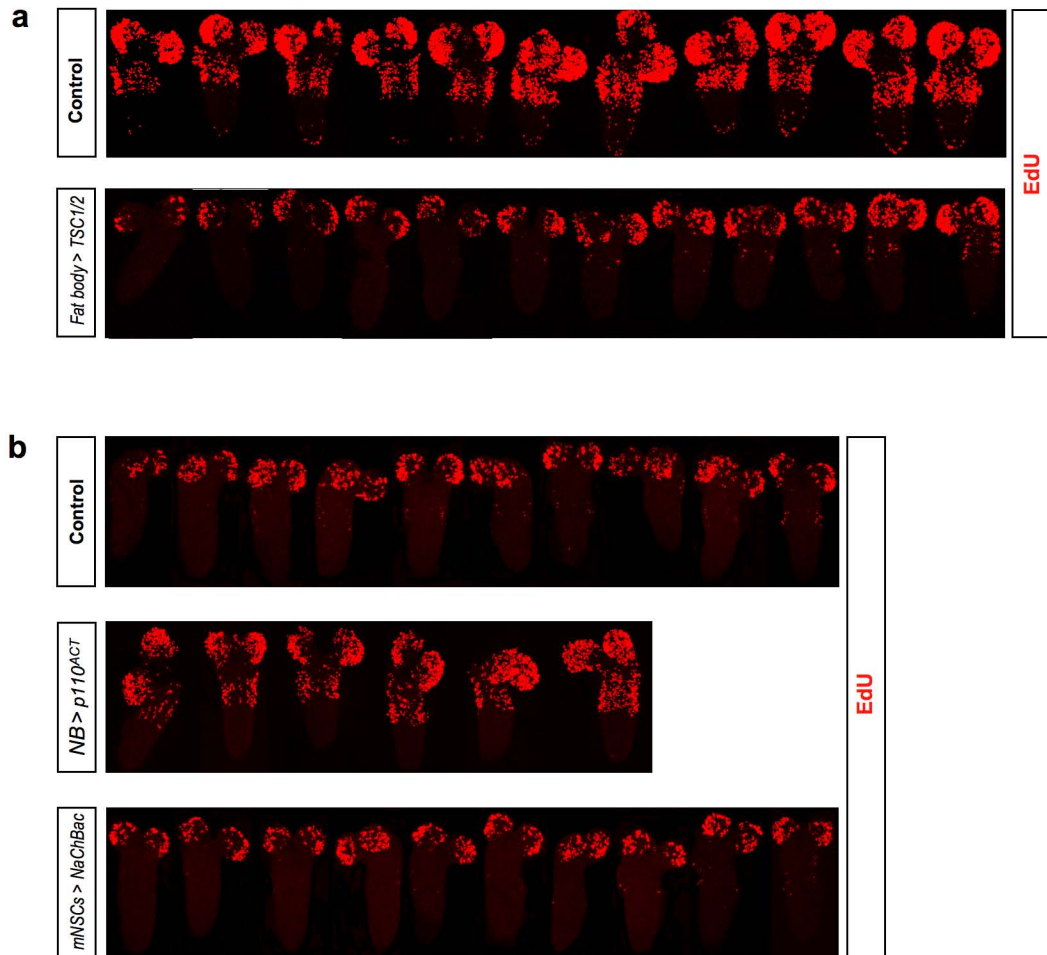

**Supplementary Figure 1 | The EdU incorporation assay.** **a**, Galleries of larval CNSs comparing a control genotype: *Cg-GAL4/+; TM6B,Sb,Dfd-YFP/+* (*Fat body* >) and a genotype impairing neuroblast reactivation: *Cg-GAL4/+; UAS-TSC1,UAS-TSC2/+* (*Fat body* > *TSC1/2*). **b**, Galleries of larval CNSs comparing a control genotype: *Ilp2-GAL4/CyO,Dfd-YFP*, a genotype resulting in precocious neuroblast reactivation: *nab-GAL4; UAS-p110<sup>ACT</sup>* (*NB* > *p110<sup>ACT</sup>*), and a genotype with no significant effect on reactivation: *Ilp2-GAL4/+; UAS-NaChBac/+* (*mNSCs* > *NaChBac*). EdU<sup>+</sup>/Repo<sup>+</sup> double-positive cells represent less than 6% of total EdU<sup>+</sup> cells in this study (data not shown).

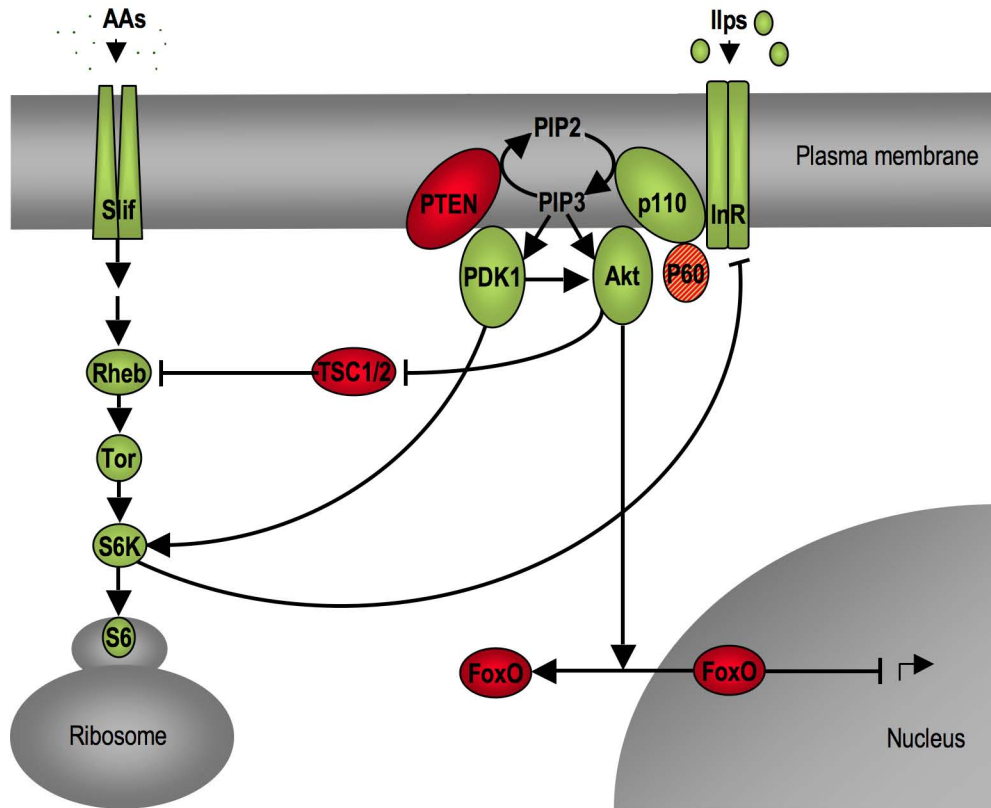

Positive  
 Negative

} Regulators of the pathway and of growth and proliferation

**Supplementary Figure 2 | The Tor and PI3K signalling network.** Simplified schematic of the interconnected Slif/TOR and InR/PI3K pathways in *Drosophila*, depicting the proteins genetically manipulated in this study. AA, aminoacids; Slif, Slimfast; TSC1/2, Tuberous Sclerosis Complex 1 and 2; Rheb, Ras homologue enriched in brain; S6K, S6 Kinase; S6, Ribosomal protein small subunit 6; Ilps, Insulin-like peptides; InR, Insulin receptor; PIP2, Phosphatidylinositol (4,5)-bisphosphate; PIP3, Phosphatidylinositol (3,4,5)-triphosphate; p110, catalytic subunit of the phosphatidylinositol 3-kinase (PI3K); p60, adaptor subunit of PI3K (green and red hatching as it acts as a dominant-negative when overexpressed); PTEN, Phosphatase and Tensin homologue; PDK1, Phosphoinositide-dependent kinase 1; Akt, AKR mouse T-cell lymphoma-inducing Serine-Threonine kinase; FoxO, Forkhead box subgroup O transcription factor.

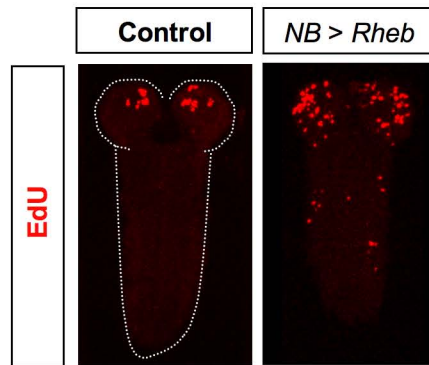

**Supplementary Figure 3 | Hyperactivation of TOR signalling increases neural proliferation at larval hatching.** EdU-labelled CNSs from newly hatched L1 larvae showing that Rheb overexpression in neuroblasts (*NB > Rheb*) inhibits early larval quiescence. The neuroblast driver used (*nab-GAL4*) is only expressed from late embryonic stage 14 onwards.

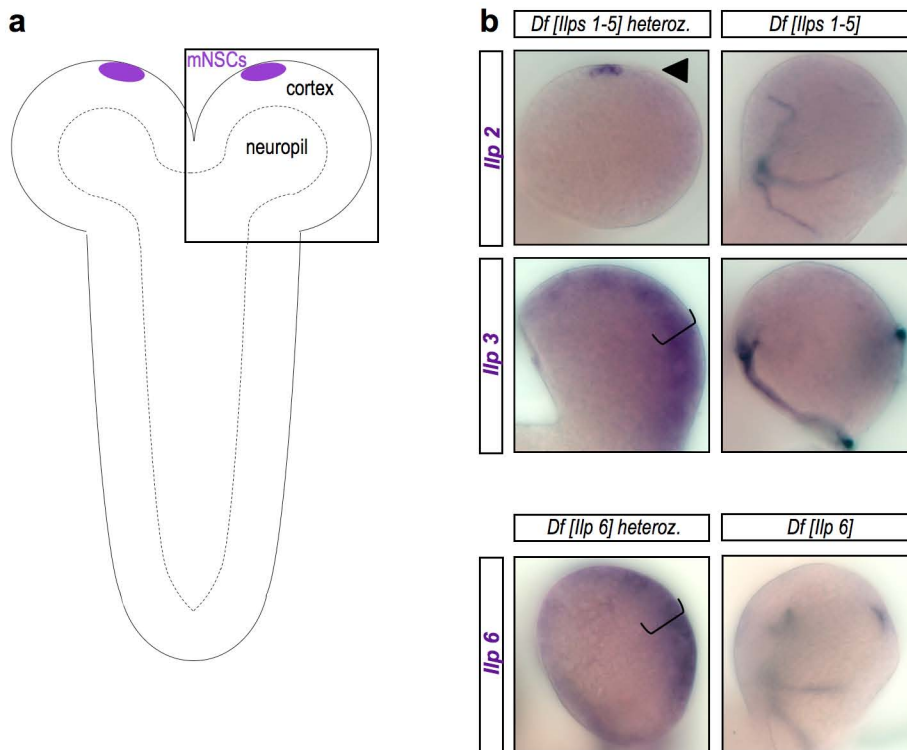

**Supplementary Figure 4 | *Ilp2*, *Ilp3* and *Ilp6* expression in the early L2 CNS.** **a**, Schematic of early larval CNS, highlighting the cortex (containing most soma) and neuropil (containing most axons), the position of mNSCs and the brain-lobe region shown stained in **b** (square inset) are indicated. **b**, Panels show *in situ* hybridizations for *Ilp2*, *Ilp3* or *Ilp6* mRNA in the brain lobes of early L2 larvae heterozygous (left) or homozygous (right) for a deficiency removing the *Ilp1-5* gene cluster, *Df*[*Ilps1-5*] or removing *Ilp6*, *Df*[*Ilp6*]. Brackets highlight the cortex expressing *Ilp 3* and *Ilp 6*. Note that the strong background staining (seen in heterozygotes and homozygotes) corresponds to tracheal branches associated with the CNS.
